# Supplementary material for: Producing SWOT measurements with a multiscale data assimilation system during the prelaunch field campaign
Source: Copernicus journal article supplement (doi:10.5194/egusphere-2022-1399), 2022-12-20
Supplement: Supplementary file [file egusphere-2022-1399-AC3-supplement.pdf]

1 **RC1 Comment**

2 The authors make a bold claim in the manuscript that they have “extended” the 3DVAR  
3 algorithm (section 3) by including time distributed observations in the cost function, and  
4 inflating their associated observation error due to the “sampling time error”. First, this is nothing  
5 new or different than FGAT: even though innovations are calculated in time, collocated  
6 observations cannot be assimilated simultaneously. Second, analysis increments are still being  
7 computed only at the analysis time, so the corrections are not applied at the time of the  
8 observations that is different from the analysis time. This is due to the nature of 3DVAR and its  
9 static covariance. I thus don’t understand why the authors claim this is an extension of 3DVAR.  
10 The authors also liken their cost function to and consider it to be a reduced 4DVAR cost  
11 function. The similarity of the const functions should not be a basis for comparison, even via  
12 reduction, of 3DVAR and 4DVAR. Their respective cost functions are minimized under different  
13 constraints. In 4DVAR, those constraints include strong or weak model dynamics, and in  
14 3DVAR there is no dynamical constraints. The authors should avoid making such confusing  
15 comparisons. The method proposed in section 3 is nothing but a MS3DVAR with FGAT.

16 **Reply: We revised the manuscript in response to this comment.**

17

18 **3 An three-dimensional multiscale scheme**

19

20 The MSDA-SWOT system has been developed to address new challenges relating to the fine-  
21 scale resolution and data density of satellite observations in the SWOT altimetry era. As such,  
22 the numerical ocean model used should be high resolution with a grid spacing on the order of 1  
23 km or finer. This imposes a major computational challenge to formulate MSDA-SWOT. Both  
24 the field campaign and SWOT measurements are localized to a limited area. Another major  
25 challenge is to assimilate these localized measurements seamlessly along with the broad routine  
26 observations. Otherwise, a spurious circulation surrounding the observing area may develop, and  
27 data assimilation could even fail. To address these two major challenges, we have formulated a  
28 particular MSDA scheme, which is based on a 3DVAR algorithm that aims to assimilate  
29 observations over a time window.

30

31 **3.1 3DVAR Formulation**

32

33 For a very high-resolution model, 3DVAR is a scheme often used in both meteorological  
34 and oceanic applications (e.g., Gustafsson, et al., 2018), because of its computational efficiency.

35 Algorithmically, a 3DVAR scheme can assimilate observations taken only at an instantaneous

Deleted: extended

Deleted: is extended

Deleted: An extended 3DVAR scheme

Deleted: extensively

Deleted: However,

Deleted: a

Deleted: formally

43 time. In practice, observations over a time window are assimilated with the assumption that they  
 44 are taken at the DA time. As such, there is a difference between the observation time and DA  
 45 time. This time difference inputs error to the system, which we term as 'sampling time error'. In  
 46 practice, a short time window is selectively chosen as a compromise between incorporating more  
 47 observational information, and keeping the sampling time error at an acceptable level.

48 To alleviate this short time window limitation in 3DVAR, we [here present a method to](#)  
 49 [assimilate observations for a longer time window by account for sampling time error.](#) Suppose  
 50 that at time  $t_k$  ( $k = 1, 2, \dots, K$ ), a number  $m$  of observations (note that  $m$  could vary in time) are  
 51 available and placed into an  $m$ -vector  $\mathbf{y}_k^o$ .  $\mathbf{R}_k^o$  is observational error covariance, and  $\mathbf{R}_k^o =$   
 52  $\langle \mathbf{e}_k^o (\mathbf{e}_k^o)^T \rangle$ , where  $\mathbf{e}_k^o$  is the observational error associated with  $\mathbf{y}_k^o$ . The state variable at  $t_0$  can  
 53 be denoted as an  $n$ -vector,  $\mathbf{x}_0$ .

54 We [write](#) the 3DVAR cost function as

$$55 \quad J(\mathbf{x}_0) = \frac{1}{2} (\mathbf{x}_0 - \mathbf{x}_0^b)^T \mathbf{B}_0^{-1} (\mathbf{x}_0 - \mathbf{x}_0^b) + \frac{1}{2} \sum_{k=0}^K [H_k(\mathbf{x}_0) - \mathbf{y}_k^o]^T (\mathbf{R}_k^o)^{-1} [H_k(\mathbf{x}_0) - \mathbf{y}_k^o]. \quad (1)$$

56 Here  $\mathbf{B}_0$  is the background error covariance, and  $\mathbf{B}_0 = \langle \boldsymbol{\varepsilon}_0^b (\boldsymbol{\varepsilon}_0^b)^T \rangle$ , where  $\boldsymbol{\varepsilon}_0^b$  is the background  
 57 error associated with the background state  $\mathbf{x}_0^b$ .  $\mathbf{H}_k$  is often known as an observation operator that  
 58 maps the state variable to  $\mathbf{y}_k^o$ .

59 The cost function (1) has a form similar to the four-dimensional variational data assimilation  
 60 (4DVAR) algorithm (e.g., Li & Navon, 2001), which has been implemented for oceanic  
 61 applications (e.g., Weaver et al., 2003; Moore, et al., 2004; Zhang et al., 2010; Ndogodock &  
 62 Carrier, 2014). In 4DVAR,  $\mathbf{x}_0$  in the observation related terms in (1) is replaced by  $\mathbf{x}_k$ , [in order to](#)  
 63 [assimilate observations over a time window.](#) [Although the cost function \(1\) has a form of a](#)  
 64 [4DVAR cost function.](#) [It is fundamentally different from 4DVAR, since no forecast is applied, or](#)  
 65 [only](#) a persistence forecast model is used in 4DVAR.

66 [The](#) cost function (1) is [mainly](#) used to account explicitly for the observation error due to the  
 67 difference between the observation and DA time. By definition, the observational error in (1)  
 68 has the form (e.g., Li et al. 2015),

$$69 \quad \mathbf{e}_k^o = \mathbf{y}_k^o - H_k(\mathbf{x}_0^t), \quad (2)$$

70 where  $\mathbf{x}_k^t$  is the unknown true state. We can write (2) in the expansion form

$$72 \quad \begin{aligned} \mathbf{e}_k^o &= (\mathbf{y}_k^o - \mathbf{y}_k^t) + (\mathbf{y}_k^t - H_k(\mathbf{x}_k^t)) + (H_k(\mathbf{x}_k^t) - H_k(\mathbf{x}_0^t)) \\ 71 \quad &= \mathbf{e}_k^m + \mathbf{e}_k^r + \mathbf{e}_k^{mp}, \end{aligned} \quad (3)$$

Deleted: here formulate a scheme to extend the ability of 3DVAR to assimilate observations in a longer time window.

Deleted: extend

Deleted: standard

Deleted: so that it can naturally

Deleted: T

Deleted: can be considered as

Deleted: reduced

Deleted: , in which

Deleted: a

Deleted: approximation of  $\mathbf{x}_k = \mathbf{x}_0$

Deleted: in which

Deleted: Rather than the standard 3DVAR cost function,

Deleted: t

87 where  $y_k^t$  is the unknown true value of  $y_k^o$ .

88 In (3), the first term is the measurement error, and the second term the representation error  
89 due to the inaccurate observation operator. These two terms are well known. The last term is a  
90 new type of observational error. We can understand it in the following way. If all the  
91 observations are taken at  $t_0$ , this type of error does not occur. We follow the formulation (3) to  
92 estimate the error arising from the difference between the observation time and DA time.

93 The MSDA-SWOT system is based on (1) and (3). Because  $t$  is allowed to be negative in (1),  
94 we assimilate observations prior to and after the DA time. We note that this 3DVAR has the  
95 same objective as First Guess at Appropriate Time (FGAT), another scheme used in conjunction  
96 with 3DVAR (e.g. Martin et al., 2015), which is [also](#) discussed in Archer et al. (2021).

97

Deleted: extended
